# Advanced Critical Care

## Acknowledgment of Reviewers

Special thanks to those individuals who provided peer review of journal manuscripts during 2019.

**Danyel Adams, PharmD**

**Cynthia Bautista, PhD, RN, CNRN**

**Richard Arbor, MSN, RN, CCRN, CNRN, CCNS, CCTC, FCCM, FAAN**

**Elizabeth Katz Brock, MS, RN, ACNP, CCRN**

**Denise Buonocore, MSN, ACNPC, CCNS, CCRN, CHFN**

**Lisa Burry, PharmD**

**Elizabeth Carnell, BSN, RN**

**Devin Carr, DNP, RN, RRT, ACNS-BC, NEA-BC, CPPS**

**Dennis Cheek, PhD, RN, FAHA**

**Maria Cvach, DNP, RN, CCRN**

**Diane Dressler, MSN, RN**

**Shelba Durston, MSN, RN**

**Tiffany Green, MS, ACNPC-AG, ACCNS-AG**

**Scott T. Faust, MS, ACNP-BC, ACNPC, CEN**

**Susan Barbara Fowler, PhD, RN, CNRN, FAHA**

**Jill Guttormson, PhD, RN**

**Leslie Hamilton, PharmD, BCPS, BCCCP, FCCP, FCCM**

**Linda Harrington, PhD, DNP, RN-BC, CNS, CPHQ, CENP, CPHIMS**

**Breanna Hetland, PhD, RN, CCRN-K**

**Stacy Jepsen, MS, APRN, ACNS-BC, CCRN**

**Allison R. Jones, PhD, RN, CCNS**

**Karen K. Giuliano, PhD, RN**

**Roberta Kaplow, PhD, RN, APRN-CCNS, AOCNS, CCRN**

**Joel Katz, PhD**

**Deborah Goldenberg Klein, MSN, RN, CCRN, CS**

**Angela Larson, PhD, APRN, CNS, ACCNS-AG, CCNS, CCRN**

**Denise Li, PhD, RN, AGACNP-BC, CNS**

**Helene Loeb, BS, MSN, RN-BC, CPHQ**

**Mary Beth Flynn Makic, PhD, RN, CCNS, CCRN-K, FCNS, FNAP, FAAN**

**Marc O. Martel, PhD**

**Jennifer McAdam, PhD, RN**

**Nancy Munro, MN, RN, CCRN, ACNP-BC, FAANP**

**Joe Napolitano, PhD, MPH, RN, CRNP**

**AnneMarie Palatnick, DNP, RN, ACNS-BC**

**Jordi Perez, MD, PhD, FIPP**

**Marc Perreault, PharmD, MSc, FCSHP**

**Michael Petty, PhD, RN, APRN-CNS, CCNS**

**Kathleen Puntillo, PhD, RN, FAAN**

**Carol Ann Rauen, MS, RN-BC, CCRN, PCCN, CEN, TCRN**

**Halley Ruppel, PhD, RN**

**Teresa Savino, MSPSLA, BSN, RN**

**Maureen A. Seckel, MSN, RN, APRN-BC, CCNS, CCRN**

**Yoram Shir, MD**

**Donna Siegmeister, MS, RN, PCCN**

**Marsha Stanton, PhD, RN**

**Clareen Wiencek, PhD, RN, ACNP, ACHPN**

**Margaret Yoho, MSN, RN, ASQ CSSBB**
